# Supplementary material for: A simple “on–off–on” ECL sensor for glucose determination based on Pd nanowires and Ag doped g-C3N4 nanosheets
Source: Royal Society of Chemistry journal article supplement (doi:10.1039/c9ay02357g), 2019-12-04
Supplement: c9ay02357g1.pdf [file c9ay02357g1.pdf]

*Supplementary materials for*

**A simple “on-off-on” ECL sensor for glucose determination  
based on Pd nanowires and Ag doped g-C<sub>3</sub>N<sub>4</sub> nanosheets**

Yu Fan<sup>a</sup>, Shihong Chen<sup>b</sup>, Shaping Wei<sup>b</sup>, Jinlin Guo<sup>a\*</sup>, Yang Li<sup>a\*</sup>

<sup>a</sup> *College of Medical Technology, Chengdu University of Traditional Chinese  
Medicine, Chengdu 611137, China*

<sup>b</sup> *Key Laboratory of Luminescent and Real-Time Analytical Chemistry (Southwest  
University), Ministry of Education, College of Chemistry and Chemical Engineering,  
Southwest University, Chongqing 400715, China*

The cyclic voltammetry (CV) measurements were performed in 5.0 mM  
[Fe(CN)<sub>6</sub>]<sup>3-/4-</sup> to characterize the eletroconductivity behavior of PdNWs of the sensor.

As shown in the following Fig. S1, compared with the Ag-g-C<sub>3</sub>N<sub>4</sub>/GCE (curve b), the  
redox current of PdNWs-Ag-g-C<sub>3</sub>N<sub>4</sub>/GCE (curve a) increased due to the good

---

\* Corresponding author.

**E-mail address:** [guo596@cdutcm.edu.cn](mailto:guo596@cdutcm.edu.cn). (J. Guo); [liyang@cdutcm.edu.cn](mailto:liyang@cdutcm.edu.cn). (Y. Li)

electroconductivity of PdNWs that could accelerate the electron transfer.

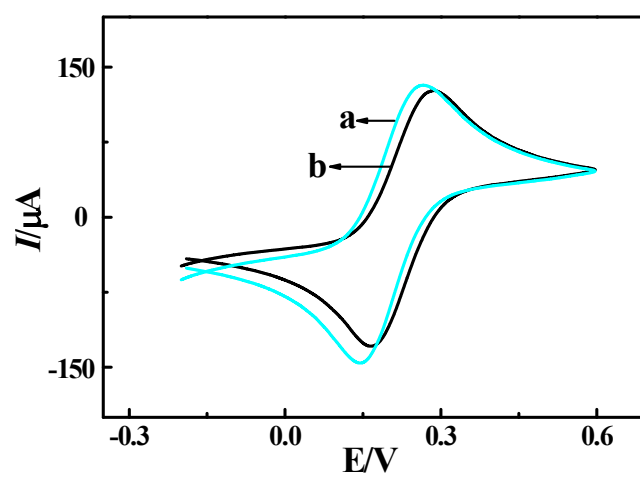

**Fig. S1.** CVs of PdNWs-Ag-g-C<sub>3</sub>N<sub>4</sub>/GCE (a), Ag-g-C<sub>3</sub>N<sub>4</sub>/GCE (b) in 5.0 mM

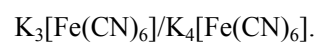

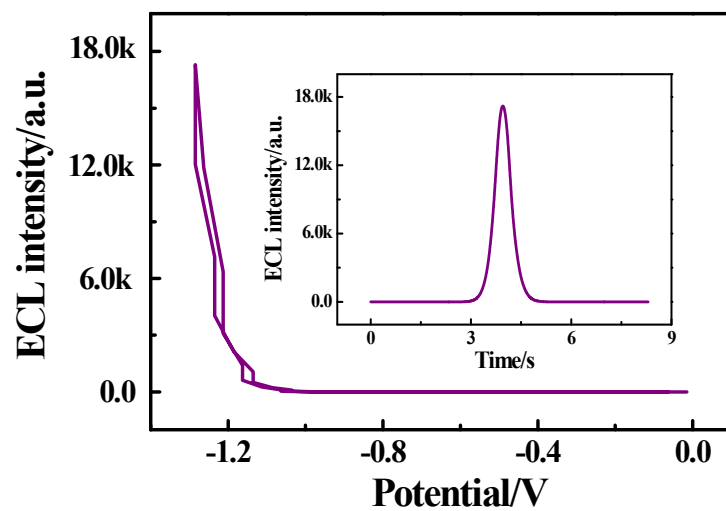

**Fig.S2.** The plots of ECL intensity versus potential: PdNWs-Ag-C<sub>3</sub>N<sub>4</sub>/GCE in PBS (pH 7.4)

containing 0.10 M K<sub>2</sub>S<sub>2</sub>O<sub>8</sub>. Scan rate: 300 mV/s. Scan voltage: -1.30 V~0.0 V.

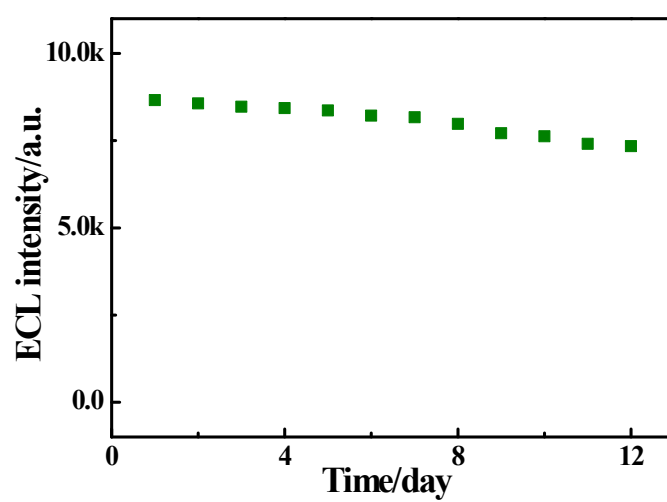

**Fig. S3.** (A) Long-term storage stability of the sensor incubated with  $2.0 \times 10^{-8}$  M glucose in PBS (pH 7.4) containing 0.10 M  $K_2S_2O_8$ .
